# Supplementary material for: Glutathione Metabolism Is a Regulator of the Acute Inflammatory Response of Monocytes to (1→3)-β-D-Glucan
Source: Front Immunol. 2021 Nov 11;12:694152. doi: 10.3389/fimmu.2021.694152 (PMC8631827; doi:10.3389/fimmu.2021.694152)
Supplement: Supplementary Table 5 — TRUUST analysis of differentially expressed genes after 24 hours of BDG exposure in human monocytes. [file Table_5.xlsx]

## Sheet: S5A - TRUUST Results
	Supplementary Table 5A - TRUUST analysis of differentially expressed genes after 24 hours of BDG exposure in human monocytes
	Differentially up-regulated genes			Differentially down-regulated genes
	Human Transcription Factor	-log10(p-value)		Human Transcription Factor	-log10(p-value)
	NFE2L2	8		RFX5	13
	PPARA	5		NFKB1	12
	NPM1	4		SPI1	8
	HSF1	3		RELA	5
	PPARG	3		JUN	5
	STAT3	3		CIITA	4
	ABL1	3		AR	3
	SOX6	2		IRF2	3
	SPI1	2		HIF1A	3
	MYC	2		CEBPB	2

## Sheet: S5B - TRUUST GO
	Supplementary Table 5B - Gene ontology of transcription factors identified from TRUUST analysis
	Differentially up-regulated TF TRUUST hits			Differentially down-regulated TF TRUUST hits
	Gene ontology	-log10(p-value)		Gene ontology	-log10(p-value)
	Repsonse to oxidative stress	5		Positive regulation of cytokine production	4
	Cell to cell adhesion	4		Reponse to IL-1	3
	Cytokine signalling	3		Respone to IL-6	3
	Glutathione metabolism	3		Fc receptor signaling pathway	2
	Fatty acid transport	2		Membrane protein proteolysis	2
	Regulation of cholesterol storage	2
